# Supplementary material for: Polarized emission from CsPbX3 perovskite quantum dots
Source: Royal Society of Chemistry journal article supplement (doi:10.1039/c6nr01915c), 2016-01-01

## Supporting Information

Table S1: The elemental analysis. The Br/I atom ration was detected by the EDS.

| CsPbBr <sub>3</sub> perovskite |                | CsPbBr <sub>1.5</sub> I <sub>1.5</sub> perovskite |                |
|--------------------------------|----------------|---------------------------------------------------|----------------|
| Atom                           | Atom ratio (%) | Atom                                              | Atom ratio (%) |
| Br                             | 1.73           | Br                                                | 0.74           |
| Pb                             | 0.49           | I                                                 | 0.53           |

Table S2: Detailed information of different composition samples.

| Samples                                | Emission peak /nm | FWHM /nm | QY     |
|----------------------------------------|-------------------|----------|--------|
| CsPbBr <sub>3</sub>                    | 517               | 26       | 46.91% |
| CsPbBr <sub>2.7</sub> I <sub>0.3</sub> | 522               | 25       | 31.47% |
| CsPbBr <sub>2.4</sub> I <sub>0.6</sub> | 531               | 24       | 20.50% |
| CsPbBr <sub>2.1</sub> I <sub>0.9</sub> | 544               | 24       | 24.31% |
| CsPbBr <sub>1.8</sub> I <sub>1.2</sub> | 566               | 26       | 19.19% |
| CsPbBr <sub>1.5</sub> I <sub>1.5</sub> | 566               | 30       | 26.73% |
| CsPbBr <sub>1.2</sub> I <sub>1.8</sub> | 631               | 38       | 30.49% |
| CsPbBr <sub>0.9</sub> I <sub>2.1</sub> | 655               | 40       | 48.97% |
| CsPbBr <sub>0.6</sub> I <sub>2.4</sub> | 675               | 38       | 56.42% |
| CsPbBr <sub>0.3</sub> I <sub>2.7</sub> | 688               | 37       | 62.23% |
| CsPbI <sub>3</sub>                     | 693               | 38       | 69.41% |

Table S3: Detailed polarization of different composition samples.

| Sample                                 | I <sub>max</sub> | I <sub>min</sub> | P    |
|----------------------------------------|------------------|------------------|------|
| CsPbBr <sub>3</sub>                    | 8.03 e5          | 6.89 e5          | 0.08 |
| CsPbBr <sub>2.7</sub> I <sub>0.3</sub> | 7.94 e5          | 6.62 e5          | 0.09 |
| CsPbBr <sub>2.4</sub> I <sub>0.6</sub> | 5.32 e5          | 4.16 e5          | 0.12 |
| CsPbBr <sub>2.1</sub> I <sub>0.9</sub> | 5.72 e5          | 5.10 e5          | 0.06 |
| CsPbBr <sub>1.8</sub> I <sub>1.2</sub> | 5.15 e5          | 4.66 e5          | 0.05 |
| CsPbBr <sub>1.5</sub> I <sub>1.5</sub> | 4.75 e5          | 4.15 e5          | 0.07 |
| CsPbBr <sub>1.2</sub> I <sub>1.8</sub> | 7.47 e5          | 4.90 e5          | 0.21 |
| CsPbBr <sub>0.9</sub> I <sub>2.1</sub> | 8.17 e5          | 4.50 e5          | 0.29 |
| CsPbBr <sub>0.6</sub> I <sub>2.4</sub> | 5.81 e5          | 2.99 e5          | 0.32 |
| CsPbBr <sub>0.3</sub> I <sub>2.7</sub> | 6.22 e5          | 2.85 e5          | 0.37 |
| CsPbI <sub>3</sub>                     | 7.39 e5          | 3.48 e5          | 0.36 |

Table S4: The polarization properties of different volume concentration in the hexane solution for the sample of CsPbBr<sub>0.3</sub>I<sub>2.7</sub>.

| Sample                                 | $\phi_B$ (VB/V)  | $I_{\max}$ | $I_{\min}$ | P    |
|----------------------------------------|------------------|------------|------------|------|
| CsPbBr <sub>0.3</sub> I <sub>2.7</sub> | 100 $\mu$ L/6 mL | 6.22 e5    | 2.85 e5    | 0.37 |
| CsPbBr <sub>0.3</sub> I <sub>2.7</sub> | 50 $\mu$ L/6 mL  | 7.67 e5    | 3.59 e5    | 0.36 |
| CsPbBr <sub>0.3</sub> I <sub>2.7</sub> | 25 $\mu$ L/6 mL  | 5.06 e4    | 2.22 e4    | 0.39 |
| CsPbBr <sub>0.3</sub> I <sub>2.7</sub> | 10 $\mu$ L/6 mL  | 8.61 e4    | 3.06 e4    | 0.48 |

Table S5: The polarization properties of the CsPbI<sub>3</sub> film and CsPbBr<sub>3</sub> film.

| Sample                   | $I_{\max}$ | $I_{\min}$ | P      |
|--------------------------|------------|------------|--------|
| CsPbBr <sub>3</sub> film | 2.43 e6    | 2.41 e6    | 0.0041 |
| CsPbI <sub>3</sub> film  | 4.63 e6    | 1.96 e6    | 0.41   |

Figure S1: Energy dispersive spectrometer (EDS).

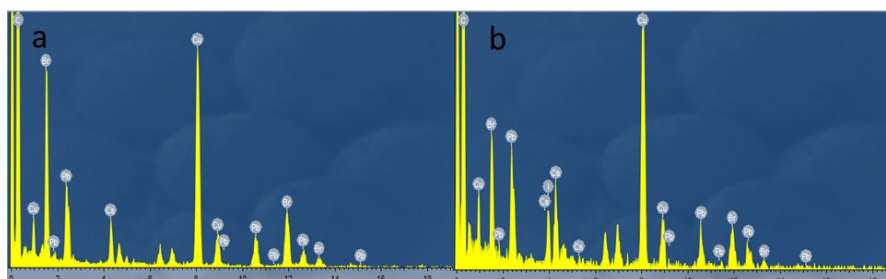

Figure S2: The UV/vis absorption spectra of perovskites samples in hexane solution.

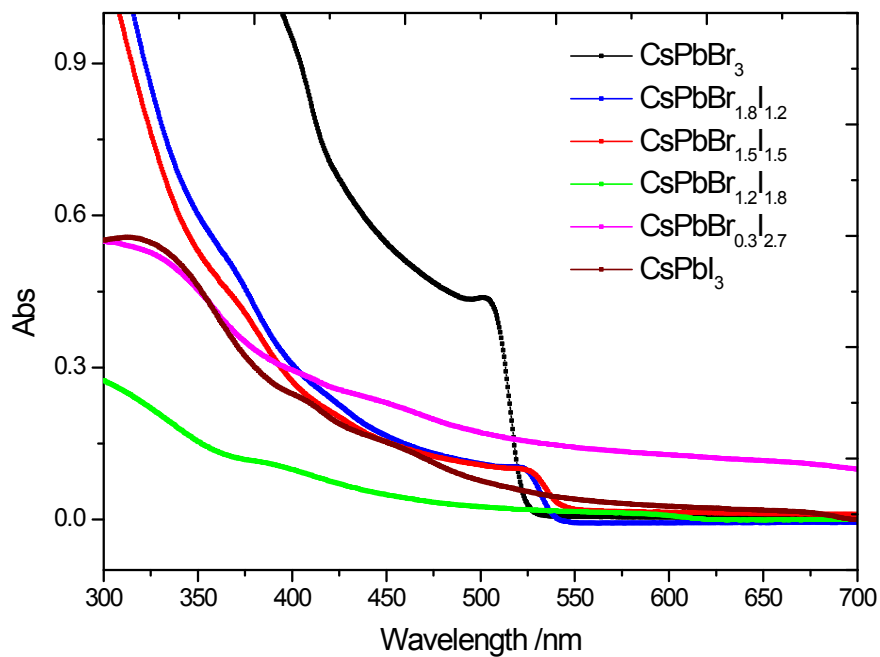

Figure S3: The polarization properties of CsPbX<sub>3</sub> or the Br/I perovskite samples in hexane solution.

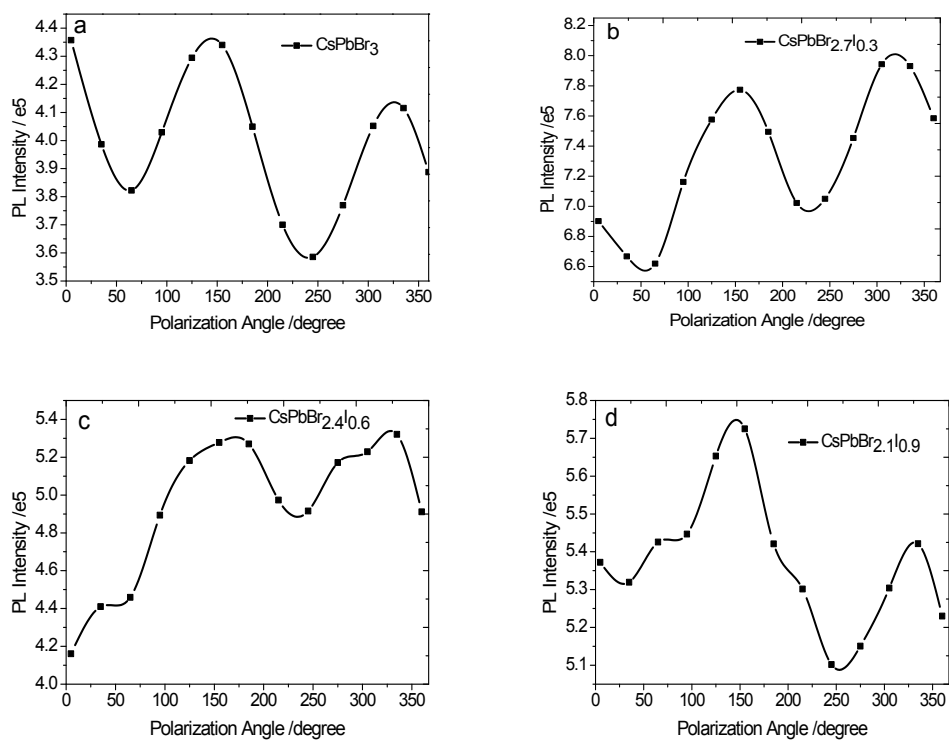

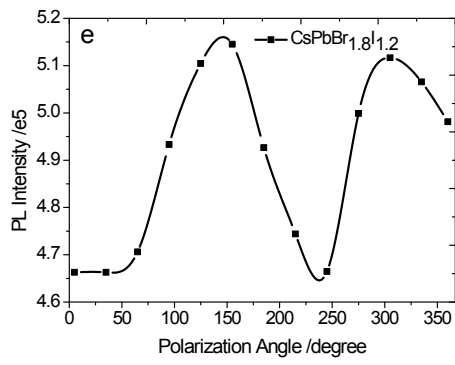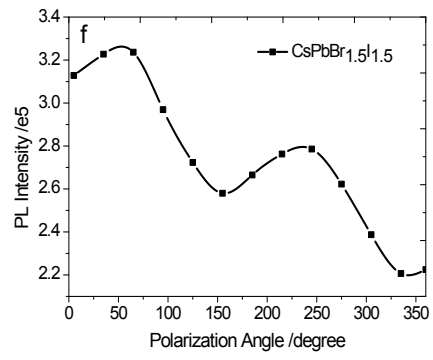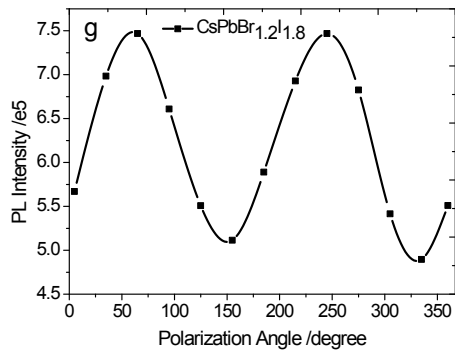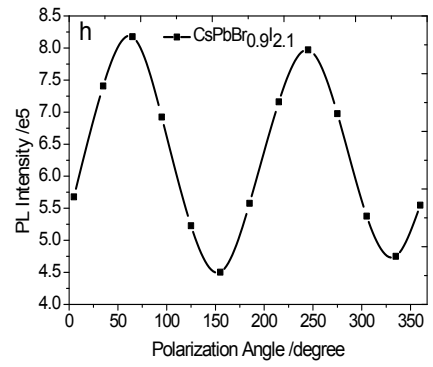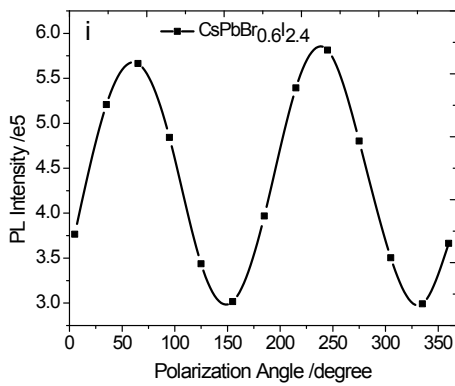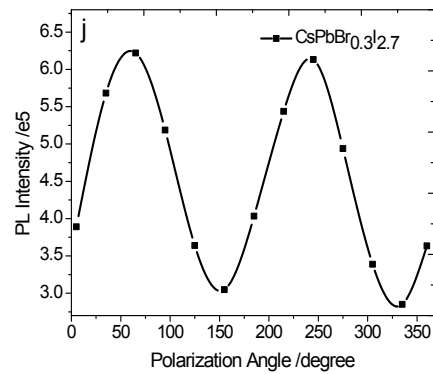

Figure S4: The polarization properties of different volume concentration in the hexane solution for the sample of CsPbBr<sub>0.3</sub>I<sub>2.7</sub> (VB/V: a: 100  $\mu$ L/6 mL; b: 50  $\mu$ L/6 mL; c: 25  $\mu$ L/6 mL; d: 10  $\mu$ L/6 mL).

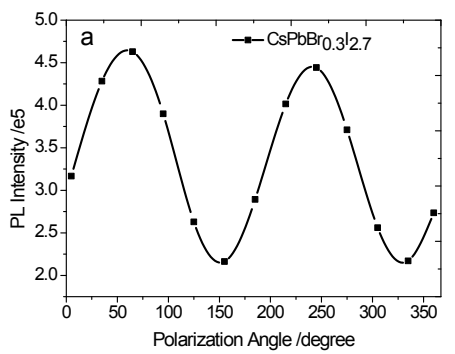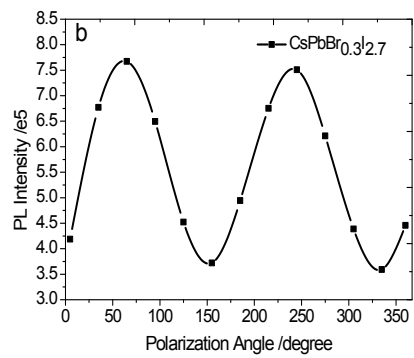

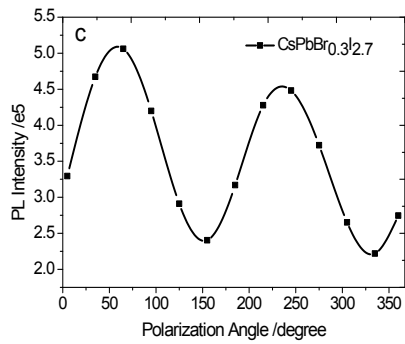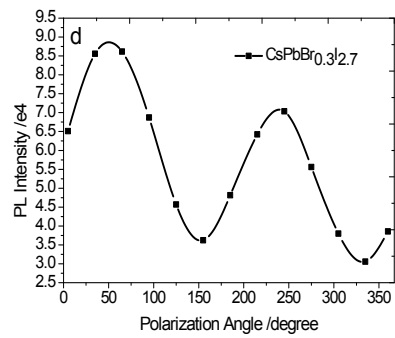

Figure S5: The polarization properties of perovskite films e: a: CsPbBr<sub>3</sub> film; b: CsPbI<sub>3</sub> film.

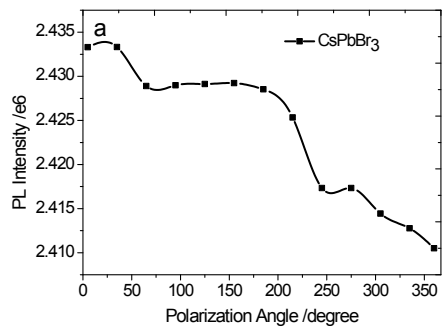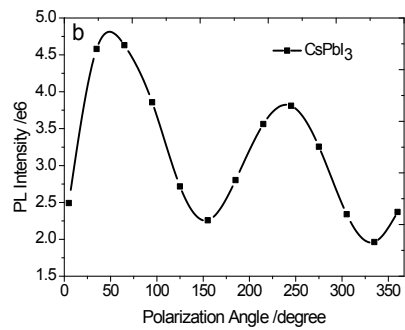

Figure S6: The TEM images of CdSe/ZnS QDs (Left) and CsPbBr<sub>3</sub> (Right).

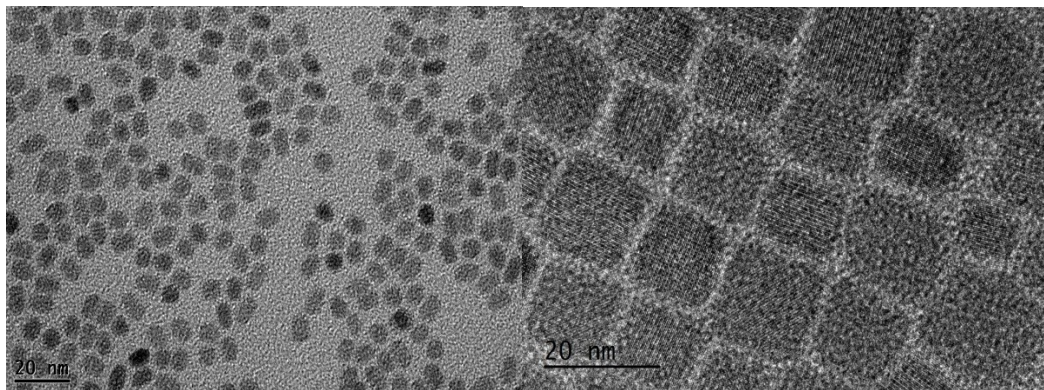

Supplement: c6nr01915c1.pdf [file c6nr01915c1.pdf]
